# Supplementary material for: Acceleration of genetic gain in cattle by reduction of generation interval
Source: PubMed Central journal article supplement (PMC4345332; doi:10.1038/srep08674), 2015-03-02
Supplement: srep08674-s1.pdf [file srep08674-s1.pdf]

## Acceleration of genetic gain in cattle by reduction of generation interval

Poothappillai Kasinathan<sup>1\*</sup>, Hong Wei<sup>1</sup>, Tim Xiang<sup>1</sup>, Jose Molina<sup>1</sup>, John Metzger<sup>1</sup>, Diane Broek<sup>1</sup>, Sivakanthan Kasinathan<sup>2</sup>, David C. Faber<sup>1</sup> and Mark F. Allan<sup>1</sup>

<sup>1</sup>Trans Ova Genetics, LC, Sioux Center, IA 51250.

<sup>2</sup>Medical Scientist Training Program, University of Washington School of Medicine, Seattle, WA 98195.

\*Corresponding author: P. Kasinathan ([kasi@transova.com](mailto:kasi@transova.com))

### Supplementary Materials

|                              |                                                                                                                                                  |
|------------------------------|--------------------------------------------------------------------------------------------------------------------------------------------------|
| <b>Supplementary Table 1</b> | Genomic enhanced genetic merit analysis of fibroblast cell lines. Values for industry indexes commonly used to evaluate genetic merit of cattle. |
| <b>Supplementary Table 2</b> | <i>In vitro</i> development of embryos derived from fibroblast cell lines.                                                                       |

Supplementary Table 1: Genomic analysis of DNA from cell lines

| Cell line ID | JPI Gen | CM Gen | NM Gen | PTAT Gen | MILK Gen | FAT Gen | PRO Gen | PL Gen | SCS Gen | DPR Gen | UDC Gen | Haplotypes                  |
|--------------|---------|--------|--------|----------|----------|---------|---------|--------|---------|---------|---------|-----------------------------|
| FL065        | 251     | 750    | 680    | 2.1      | 880      | 75      | 41      | 6.5    | 2.86    | 1.2     | 6.13    | JH1T JH1 PC.N JHPT JHP PC.N |
| FL062        | 224     | 688    | 623    | 1.8      | 669      | 65      | 34      | 6.2    | 2.86    | 1.6     | 5.02    | JH1T JH1 PC.N JHPT JHP PC.N |
| FL064        | 221     | 708    | 618    | 1        | 501      | 63      | 33      | 6      | 2.73    | 1.5     | 4.92    | JH1T JH1 PC.N JHPT JHP PC.N |
| FL017        | 215     | 692    | 607    | 0.9      | 470      | 60      | 31      | 5.8    | 2.72    | 1.9     | 4.35    | JH1T JH1 PC.N JHPT JHP PC.N |
| FL036        | 210     | 594    | 571    | 1.4      | 909      | 32      | 29      | 6.6    | 2.76    | 1.1     | 5.76    | JH1T JH1 PC.N JHPT JHP PC.N |
| FL066        | 205     | 673    | 598    | 1.7      | 465      | 63      | 28      | 6.3    | 2.72    | 0.2     | 5.56    | JH1T JH1 PC.N JHPT JHP PC.N |
| FL040        | 192     | 531    | 484    | 1.1      | 782      | 38      | 32      | 4.3    | 2.8     | 1       | 5       | JH1T JH1 PC.N JHPT JHP PC.N |
| FL030        | 192     | 507    | 509    | 1.5      | 1191     | 33      | 32      | 5.6    | 2.8     | 1.1     | 5.22    | JH1T JH1 PC.N JHPT JHP PC.N |
| FL067        | 191     | 646    | 565    | 1.2      | 237      | 58      | 24      | 6.1    | 2.78    | 1.2     | 4.81    | JH1T JH1 PC.N JHPT JHP PC.N |
| FL038        | 185     | 562    | 499    | 1.3      | 507      | 40      | 28      | 4.8    | 2.81    | 1.2     | 4.43    | JH1T JH1 PC.N JHPT JHP PC.N |
| FL022        | 184     | 508    | 490    | 1        | 1313     | 50      | 40      | 3.7    | 2.77    | 0.2     | 1.78    | JH1T JH1 PC.N JHPT JHP PC.N |
| FL004        | 183     | 546    | 484    | 1.5      | 520      | 46      | 28      | 4.2    | 2.8     | 0.4     | 4.9     | JH1T JH1 PC.N JHPT JHP PC.N |
| FL039        | 180     | 456    | 432    | 0.8      | 1240     | 45      | 41      | 3.4    | 2.89    | -0.1    | 2.88    | JH1T JH1 PC.N JHPT JHP PC.N |
| FL009        | 176     | 460    | 432    | 1.1      | 1067     | 30      | 36      | 4.1    | 2.87    | 0       | 3.89    | JH1T JH1 PC.N JHPT JHP PC.N |
| FL010        | 176     | 524    | 456    | 1.8      | 474      | 47      | 28      | 3.7    | 2.79    | 0.4     | 5.2     | JH1T JH1 PC.N JHPT JHP PC.N |
| FL056        | 174     | 593    | 526    | 0.4      | 490      | 59      | 27      | 4.6    | 2.73    | 1       | 2.51    | JH1T JH1 PC.N JHPT JHP PC.N |
| FL058        | 174     | 593    | 526    | 0.4      | 490      | 59      | 27      | 4.6    | 2.73    | 1       | 2.51    | JH1T JH1 PC.N JHPT JHP PC.N |
| FL033        | 174     | 499    | 463    | 1.4      | 809      | 35      | 30      | 4.1    | 2.82    | 1       | 3.62    | JH1T JH1 PC.N JHPT JHP PC.N |
| FL063        | 173     | 566    | 512    | 1.4      | 317      | 50      | 20      | 5.5    | 2.79    | 1.5     | 4.69    | JH1T JH1 PC.N JHPT JHP PC.N |
| FL001        | 171     | 453    | 453    | 1        | 1109     | 31      | 30      | 4.2    | 2.82    | 0.6     | 3.17    | JH1T JH1 PC.N JHPT JHP PC.N |
| FL042        | 170     | 564    | 497    | 0.1      | 429      | 33      | 26      | 5.2    | 2.8     | 1.9     | 2.82    | JH1T JH1 PC.N JHPT JHP PC.N |
| FL053        | 170     | 458    | 465    | 1.5      | 1011     | 24      | 24      | 5.4    | 2.75    | 1.2     | 5.25    | JH1T JH1 PC.N JHPT JHP PC.N |
| FL011        | 169     | 484    | 423    | 0.9      | 517      | 29      | 28      | 4.2    | 2.84    | 1.1     | 5.03    | JH1T JH1 PC.N JHPT JHP PC.N |
| FL054        | 168     | 585    | 496    | 0.2      | 45       | 47      | 19      | 4.8    | 2.67    | 1.9     | 3.55    | JH1T JH1 PC.N JHPT JHP PC.N |
| FL055        | 168     | 585    | 496    | 0.2      | 45       | 47      | 19      | 4.8    | 2.67    | 1.9     | 3.55    | JH1T JH1 PC.N JHPT JHP PC.N |
| FL043        | 165     | 525    | 459    | 0.3      | 474      | 31      | 26      | 4.7    | 2.71    | 1.5     | 2.79    | JH1T JH1 PC.N JHPT JHP PC.N |
| FL046        | 165     | 525    | 459    | 0.3      | 474      | 31      | 26      | 4.7    | 2.71    | 1.5     | 2.79    | JH1T JH1 PC.N JHPT JHP PC.N |
| FL029        | 164     | 432    | 447    | 1.7      | 994      | 33      | 23      | 5.1    | 2.79    | 0.9     | 5.21    | JH1T JH1 PC.N JHPT JHP PC.N |
| FL018        | 161     | 434    | 435    | 1.8      | 850      | 36      | 22      | 4.9    | 2.8     | 1       | 5.5     | JH1T JH1 PC.N JHPT JHP PC.N |
| FL006        | 158     | 453    | 403    | 0.8      | 635      | 34      | 29      | 3.1    | 2.85    | 0.7     | 3.06    | JH1T JH1 PC.N JHPT JHP PC.N |
| FL016        | 155     | 510    | 444    | 0.9      | 261      | 42      | 21      | 4.6    | 2.81    | 1.2     | 3.53    | JH1T JH1 PC.N JHPT JHP PC.N |
| FL008        | 154     | 462    | 422    | 0.9      | 404      | 33      | 21      | 4.3    | 2.92    | 1       | 4.07    | JH1T JH1 PC.N JHPT JHP PC.N |
| FL068        | 153     | 487    | 450    | 0.8      | 559      | 49      | 23      | 4.6    | 2.85    | 0.4     | 3.01    | JH1T JH1 PC.N JHPT JHP PC.N |
| FL037        | 153     | 391    | 390    | 1.1      | 917      | 22      | 26      | 4.1    | 2.92    | 1       | 3.61    | JH1T JH1 PC.N JHPT JHP PC.N |
| FL069        | 151     | 477    | 431    | 0.9      | 582      | 38      | 25      | 4.1    | 2.77    | 0.9     | 2.72    | JH1T JH1 PC.N JHPT JHP PC.N |
| FL057        | 151     | 523    | 459    | 0.2      | 255      | 56      | 21      | 4      | 2.81    | 1.5     | 1.91    | JH1T JH1 PC.N JHPT JHP PC.N |
| FL052        | 150     | 455    | 450    | 1.7      | 543      | 25      | 13      | 5.8    | 2.66    | 1.2     | 5.28    | JH1T JH1 PC.N JHPT JHP PC.N |
| FL045        | 149     | 518    | 488    | 0.2      | 389      | 29      | 16      | 6.3    | 2.8     | 1.7     | 2.73    | JH1T JH1 PC.N JHPT JHP PC.N |
| FL005        | 149     | 435    | 392    | 1.2      | 478      | 36      | 23      | 3.3    | 2.89    | 0.6     | 3.83    | JH1T JH1 PC.N JHPT JHP PC.N |
| FL070        | 149     | 457    | 418    | 1.2      | 448      | 46      | 21      | 3.8    | 2.88    | 0.8     | 4.23    | JH1T JH1 PC.N JHPT JHP PC.N |
| FL032        | 140     | 426    | 380    | 1.1      | 417      | 30      | 21      | 3.5    | 2.83    | 1       | 3.37    | JH1T JH1 PC.N JHPT JHP PC.N |
| FL007        | 139     | 364    | 348    | 1.1      | 794      | 21      | 26      | 3      | 2.9     | 0.5     | 3.03    | JH1T JH1 PC.N JHPT JHP PC.N |
| FL060        | 138     | 489    | 438    | 0.3      | 318      | 40      | 19      | 4.5    | 2.75    | 1.1     | 1.23    | JH1T JH1 PC.N JHPT JHP PC.N |
| FL061        | 138     | 489    | 438    | 0.3      | 318      | 40      | 19      | 4.5    | 2.75    | 1.1     | 1.23    | JH1T JH1 PC.N JHPT JHP PC.N |
| FL014        | 138     | 478    | 434    | 0.4      | 252      | 33      | 15      | 5.3    | 2.79    | 1.5     | 2.45    | JH1T JH1 PC.N JHPT JHP PC.N |
| FL023        | 134     | 325    | 354    | 1.4      | 1097     | 17      | 23      | 4.2    | 2.83    | 0.5     | 3.9     | JH1T JH1 PC.N JHPT JHP PC.N |
| FL025        | 134     | 325    | 354    | 1.4      | 1097     | 17      | 23      | 4.2    | 2.83    | 0.5     | 3.9     | JH1T JH1 PC.N JHPT JHP PC.N |
| FL073        | 134     | 461    | 393    | 1.1      | 207      | 29      | 19      | 3.7    | 2.72    | 1.3     | 2.27    | JH1T JH1 PC.N JHPT JHP PC.N |
| FL035        | 132     | 452    | 397    | 1.2      | 18       | 15      | 10      | 4.9    | 2.74    | 1       | 5.14    | JH1T JH1 PC.N JHPT JHP PC.N |
| FL034        | 132     | 337    | 306    | 1.1      | 464      | 22      | 20      | 2.8    | 2.87    | 0       | 5.04    | JH1T JH1 PC.N JHPT JHP PC.N |
| FL050        | 131     | 331    | 339    | 1.2      | 904      | 26      | 22      | 3.5    | 2.82    | 0.8     | 3.87    | JH1T JH1 PC.N JHPT JHP PC.N |
| FL048        | 131     | 383    | 402    | 1.2      | 605      | 10      | 10      | 6.1    | 2.77    | 1.4     | 4.69    | JH1T JH1 PC.N JHPT JHP PC.N |
| FL020        | 129     | 404    | 392    | 1.3      | 433      | 23      | 13      | 5.2    | 2.77    | 1       | 4.87    | JH1T JH1 PC.N JHPT JHP PC.N |
| FL013        | 128     | 443    | 395    | 0.7      | 40       | 22      | 11      | 5.1    | 2.87    | 1.9     | 3.87    | JH1T JH1 PC.N JHPT JHP PC.N |
| FL051        | 122     | 384    | 396    | 1        | 610      | 5       | 11      | 6.1    | 2.69    | 1.1     | 3.54    | JH1T JH1 PC.N JHPT JHP PC.N |
| FL041        | 121     | 422    | 362    | 0.2      | 141      | 30      | 17      | 4      | 2.91    | 1.1     | 1.98    | JH1T JH1 PC.N JHPT JHP PC.N |
| FL026        | 121     | 314    | 340    | 1        | 766      | 18      | 14      | 4.7    | 2.84    | 1.1     | 3.94    | JH1T JH1 PC.N JHPT JHP PC.N |
| FL024        | 119     | 322    | 336    | 1        | 824      | 15      | 18      | 4.4    | 2.8     | 0.7     | 3.15    | JH1T JH1 PC.N JHPT JHP PC.N |
| FL049        | 119     | 293    | 308    | 1.1      | 883      | 12      | 21      | 4.1    | 2.9     | 0.6     | 3.38    | JH1T JH1 PC.N JHPT JHP PC.N |
| FL031        | 119     | 324    | 288    | 1.1      | 452      | 20      | 20      | 2.2    | 2.86    | 0.3     | 3.61    | JH1T JH1 PC.N JHPT JHP PC.N |
| FL019        | 116     | 329    | 321    | 1.3      | 558      | 17      | 17      | 4.4    | 2.95    | 0.7     | 4.15    | JH1T JH1 PC.N JHPT JHP PC.N |
| FL044        | 116     | 442    | 389    | -0.1     | 220      | 30      | 16      | 4.3    | 2.75    | 1       | 0.68    | JH1T JH1 PC.N JHPT JHP PC.N |
| FL047        | 116     | 442    | 389    | -0.1     | 220      | 30      | 16      | 4.3    | 2.75    | 1       | 0.68    | JH1T JH1 PC.N JHPT JHP PC.N |
| FL072        | 112     | 372    | 312    | 0.5      | 177      | 26      | 16      | 2.6    | 2.71    | 0.7     | 2.37    | JH1T JH1 PC.N JHPT JHP PC.N |
| FL059        | 110     | 398    | 344    | -0.2     | 133      | 20      | 15      | 3.9    | 2.82    | 1.3     | 0.88    | JH1T JH1 PC.N JHPT JHP PC.N |
| FL071        | 75      | 272    | 235    | 0.4      | 186      | 7       | 12      | 2.8    | 2.78    | 0.8     | 0.58    | JH1T JH1 PC.N JHPT JHP PC.N |

JPI- Jersey performance Index; CM-Cheese Merit; NM-Net Merit; PTAT- ;PRO-Protein; PL- ;SCS-Somatic Cell Score; DPR-Daughter Pregnancy Rate; UDC- Udder Cleft and Gen- General

**Supplementary Table 2: *In vitro* development of embryos from established cell lines**

| Cell line ID | Total nuclear transfers | Number of fused couplets (%) | Number of blastocyst on day 7 (%)* |
|--------------|-------------------------|------------------------------|------------------------------------|
| FL010        | 327                     | 222 (67.9)                   | 40 (18.0)                          |
| FL065        | 321                     | 207 (64.5)                   | 49 (23.7)                          |
| Total        | 648                     | 429 (65.2)                   | 89 (20.8)                          |

\*Blastocysts development rate was calculated from number of oocytes fused with donor somatic cell.
